# Supplementary material for: Perfluoroalkyl substance pollutants activate the innate immune system through the AIM2 inflammasome
Source: PubMed Central journal article supplement (PMC8131593; doi:10.1038/s41467-021-23201-0), 2021-05-18
Supplement: 41467_2021_23201_MOESM1_ESM.pdf [file 41467_2021_23201_MOESM1_ESM.pdf]

## **Supplementary information**

### **Perfluoroalkyl substances pollutants activate innate immune system through the AIM2 inflammasome**

**Li-Qiu Wang<sup>1</sup>, Tao Liu<sup>1</sup>, Shuai Yang<sup>1</sup>, Lin Sun<sup>1</sup>, Zhi-Yao Zhao<sup>1</sup>, Li-Yue Li<sup>1</sup>, Yuan-Chu She<sup>1</sup>, Yan-Yan Zheng<sup>1</sup>, Xiao-Yan Ye<sup>1</sup>, Qing Bao<sup>1</sup>, Guang-Hui Dong<sup>2</sup>, Chun-Wei Li<sup>1\*</sup>, Jun Cui<sup>1\*</sup>**

<sup>1</sup> MOE Key Laboratory of Gene Function and Regulation, State Key Laboratory of Biocontrol, School of Life Sciences, and Department of Otolaryngology, The First Affiliated Hospital, Sun Yat-sen University, Guangzhou, Guangdong, China

<sup>2</sup> Guangdong Provincial Engineering Technology Research Center of Environmental Pollution and Health Risk Assessment, Department of Occupational and Environmental Health, School of Public Health, Sun Yat-sen University, Guangzhou, Guangdong, China

\*Correspondence should be addressed to J.C. (cuij5@mail.sysu.edu.cn) and C.L. (hi\_chunwei@aliyun.com).

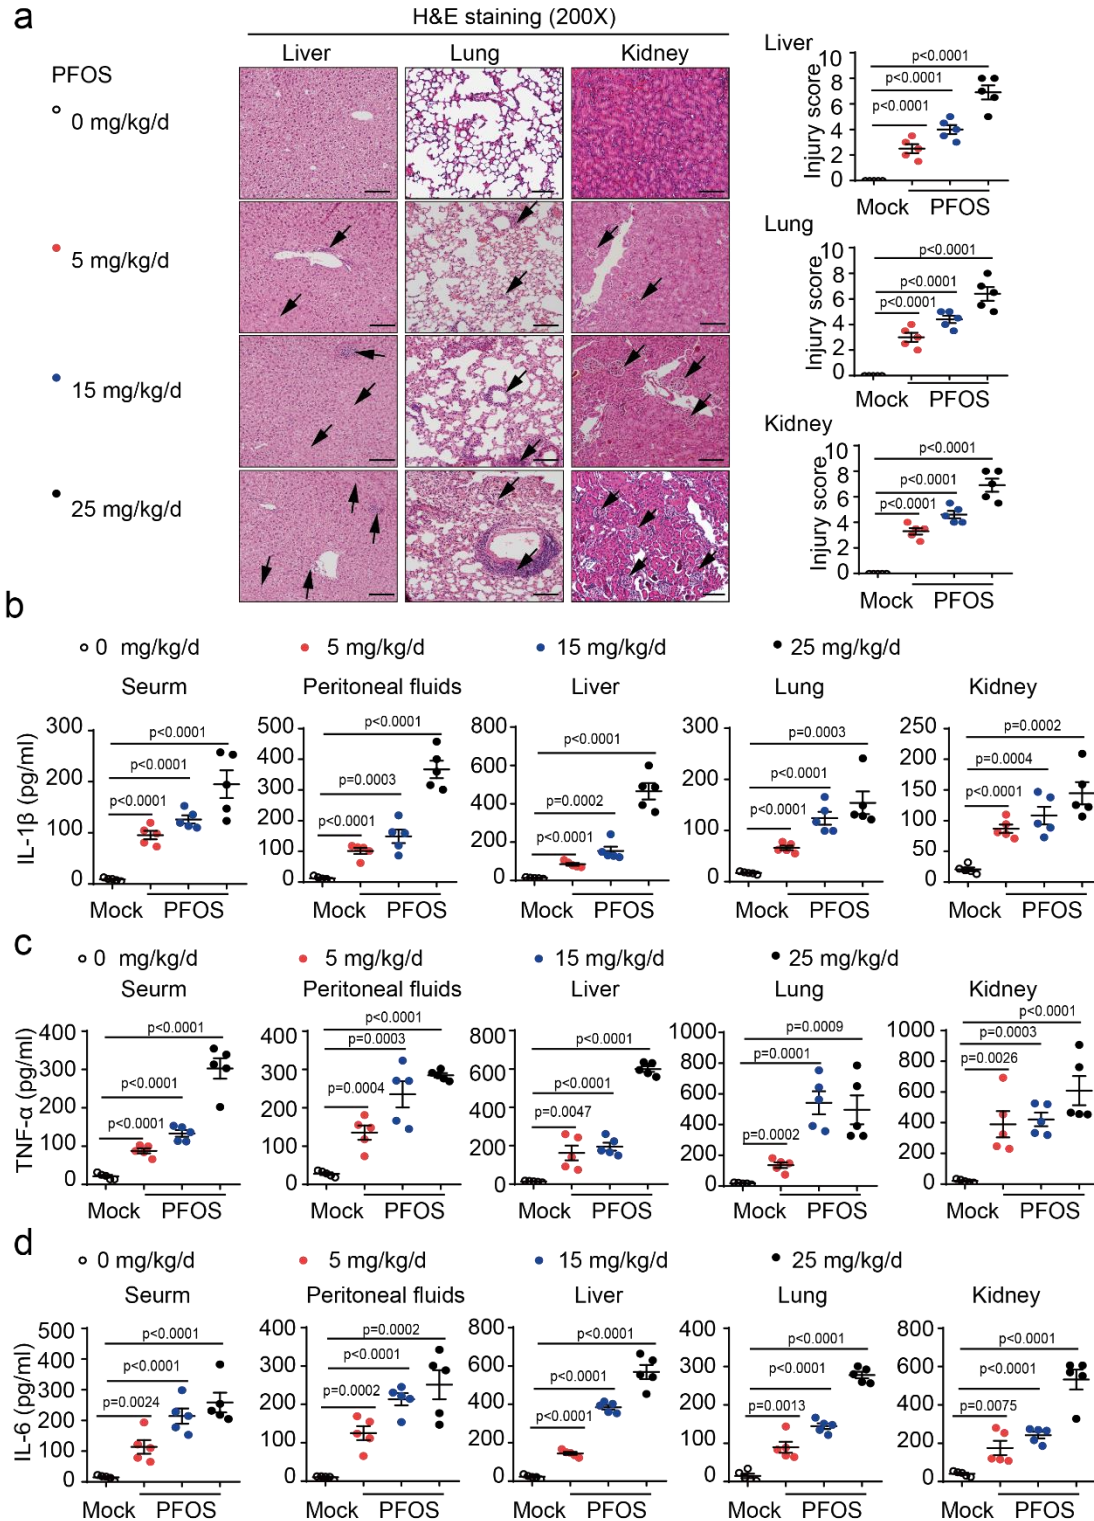

**Supplementary Fig. 1** Acute exposure of PFOS induced tissue damage and the production of pro-inflammatory cytokines in mice in a dose-dependent manner. a-d C57BL/6 mice (female, 6 weeks old, n=5) were treated with PFOS (5 (red plots), 15 (blue

plots) or 25 (black plots) mg/kg body weight per day) or treated with PBS containing 2 % Tween-80 (Mock) by intraperitoneal injection for 5 days. At 5 days post-treatment, indicated tissues were stained with hematoxylin-eosin (H&E) and assayed using a light microscope with  $\times 200$  magnification (**a**). Scale bar, 100  $\mu\text{m}$ . The tissue injury scores were determined and averaged in 5 randomly selected nonoverlapping fields from respective individual mouse tissue sections. At 5 days post-treatment, indicated tissues of treated mice were isolated and cultured for 24 h, and supernatants were analyzed by ELISA for IL-1 $\beta$  (**b**), TNF- $\alpha$  (**c**) and IL-6 (**d**). In (**a-d**), all error bars, mean values  $\pm$  SD, P-values were determined by unpaired two-tailed Student's t test of n=5 independent biological mice per group. Source data are provided as a Source Data file.

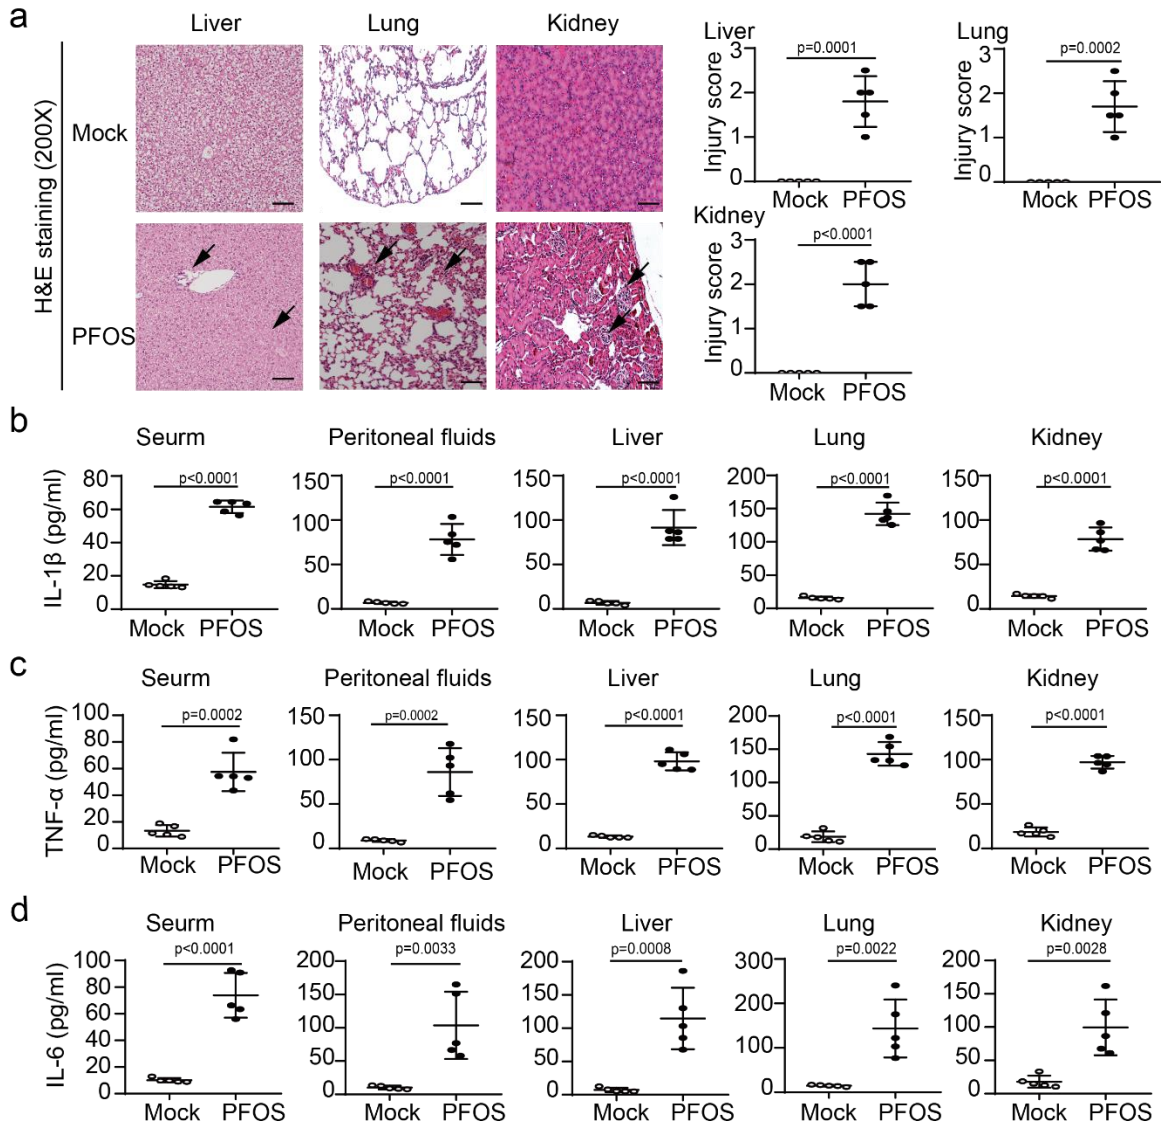

**Supplementary Fig. 2 Chronic low-dose exposure of PFOS induced tissue damage and the production of pro-inflammatory cytokines in mice.** **a-d** C57BL/6 mice (female, 6 weeks old, n=5) were treated with PFOS (0.066 mg/kg body weight per day) or treated with PBS containing 2 % Tween-80 (Mock) by intraperitoneal injection for 30 days. At 30 days post-treatment, mice liver, lung and kidney tissue were stained with hematoxylin-eosin (H&E) and assayed using a light microscope with  $\times 200$  magnification (**a**). Scale bar, 100  $\mu\text{m}$ . The tissues (liver, lung, and kidney) injury scores were determined and averaged in 5 randomly selected nonoverlapping fields from respective individual mouse tissue sections. All histology analyses were conducted in a blinded manner. At 30 days post-treatment, the liver, lung and kidney of treated mice were isolated and cultured for 24 h,

and supernatants were analyzed by ELISA for IL-1 $\beta$  (**b**), TNF- $\alpha$  (**c**) and IL-6 (**d**). In (**a-d**), all error bars, mean values  $\pm$  SD, P-values were determined by unpaired two-tailed Student's t test of n=5 independent biological mice per group. Source data are provided as a Source Data file.

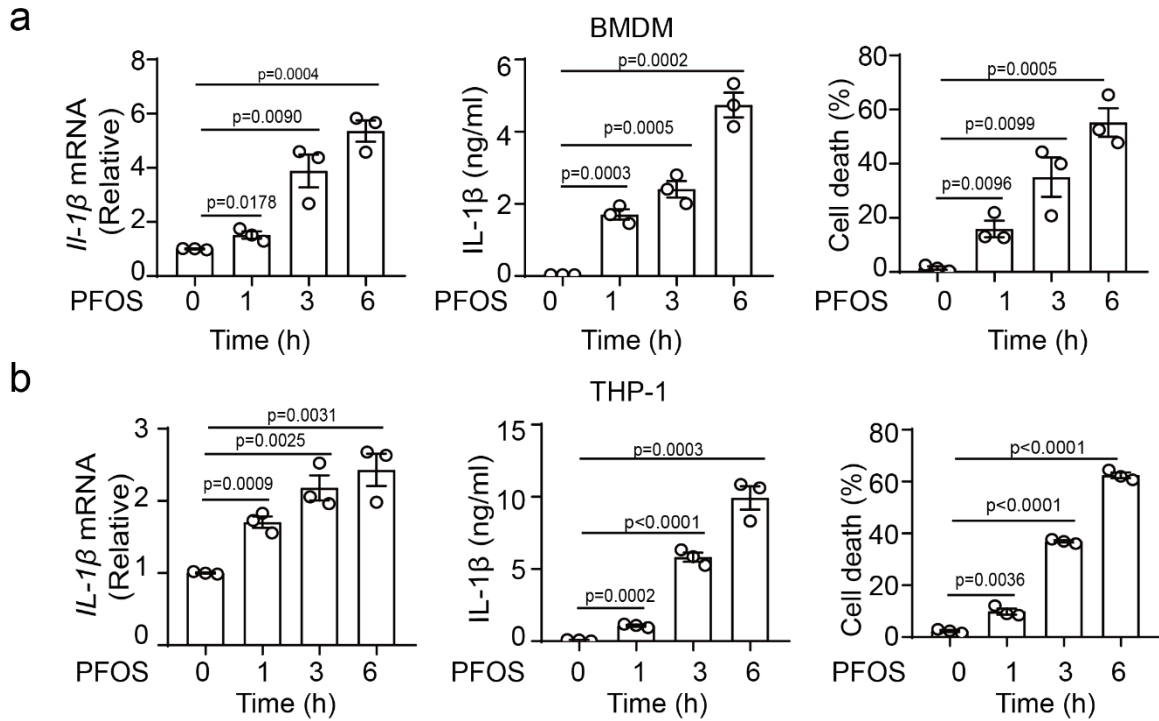

**Supplementary Fig. 3 PFOS induces IL-1 $\beta$  expression and production, and cell death in a time-dependent manner. a-b** Bone marrow-derived macrophages (BMDMs) (**a**) or THP-1-derived macrophages (**b**) were treated with PFOS (150  $\mu$ M) in indicated time points, cell lysates were collected to detect mRNA levels of *IL-1 $\beta$* , and cell supernatants were collected to measure IL-1 $\beta$  release and cell death. In (**a-b**), all error bars, mean values  $\pm$  SEM, P-values were determined by unpaired two-tailed Student's t test of n=3 independent biological experiment. Source data are provided as a Source Data file.

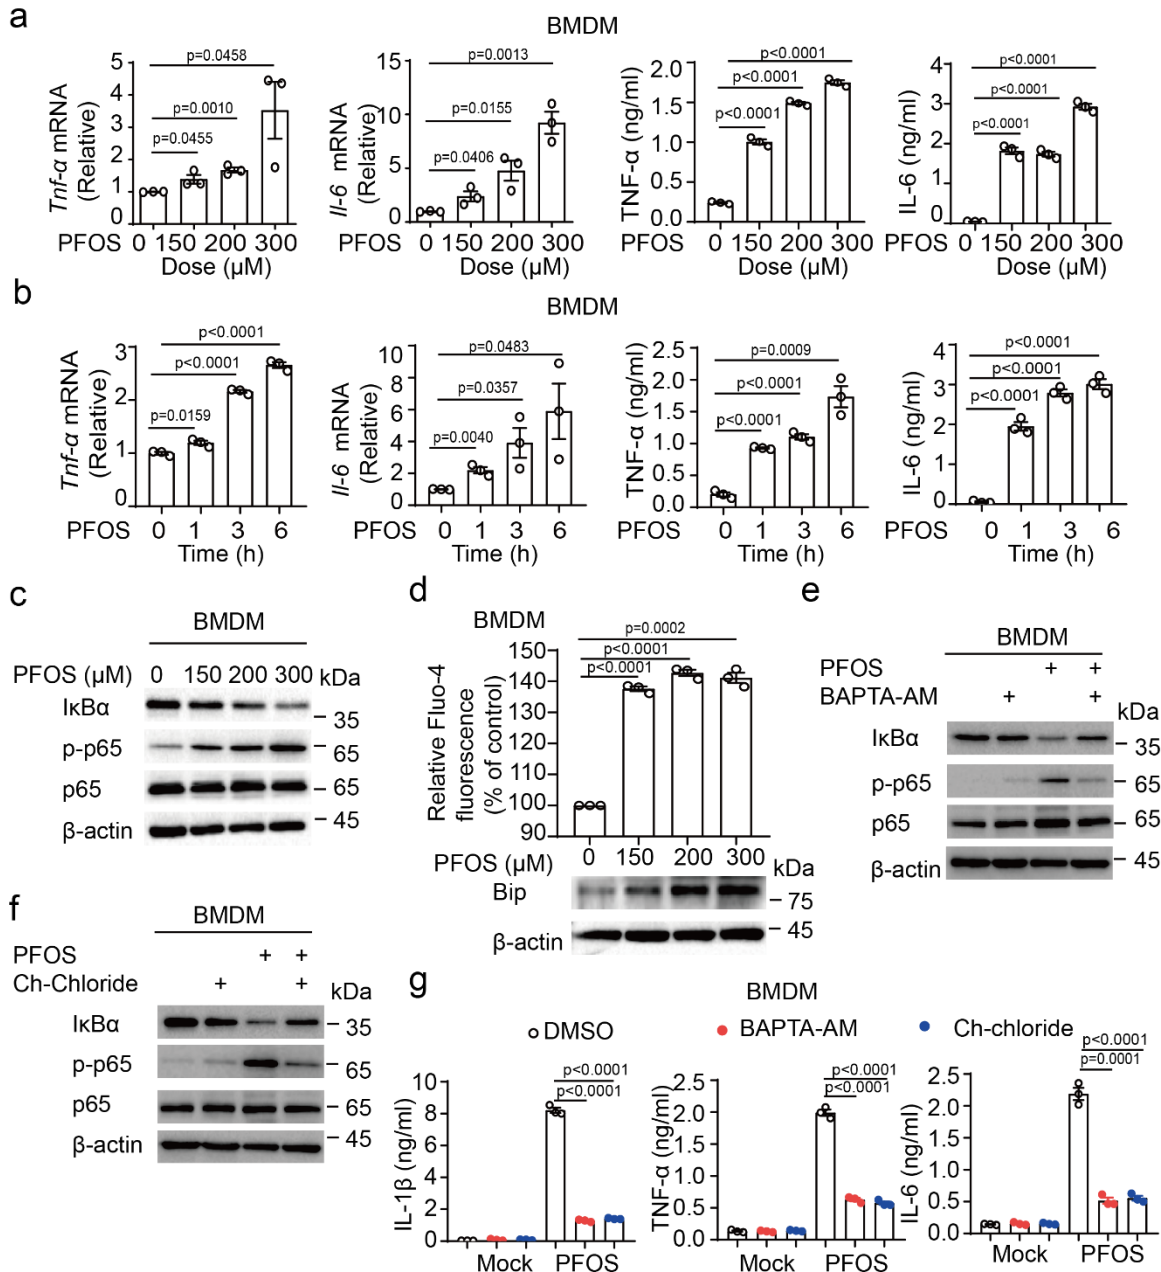

**Supplementary Fig. 4 PFOS triggers  $\text{Ca}^{2+}$ -PKC-dependent NF- $\kappa$ B signaling pathway in BMDMs.** **a-b** Bone marrow-derived macrophages (BMDMs) were treated with PFOS in a dose-dependent manner for 6 h (**a**) or in time-dependent manner with 150  $\mu$ M PFOS (**b**). The expression and production of TNF- $\alpha$  and IL-6 were determined. **c-d** Bone marrow-derived macrophages (BMDMs) were treated with PFOS in a dose-dependent manner for 6 h. Immunoblot analysis of NF- $\kappa$ B signaling pathway was performed with indicated antibodies in BMDMs (**c**). The cytosolic  $\text{Ca}^{2+}$  ( $[\text{Ca}^{2+}]_c$ ) in BMDMs with PFOS as indicated

doses for 6 h, was assessed by measuring the fluorescence of cells stained with Fluo-4 AM via using fluorescence microplate reader (excitation and emission wavelength at 488 nm and 520 nm, respectively) (**d**).  $[Ca^{2+}]_c$  was presented as the percentage relative to the value in control group. **e-g** Bone marrow-derived macrophages (BMDMs) were pretreated with  $Ca^{2+}$  chelator (BAPTA-AM, 50  $\mu$ M for 1 h, red plots) or PKC inhibitor chelerythrine chloride (Ch-Chloride, 10  $\mu$ M for 1 h, blue plots) and subsequently treated with PFOS (150  $\mu$ M, 6 h). Cell lysates were collected for immunoblot analysis. Cell supernatants were harvested to determine the release of proinflammatory cytokines (IL-1 $\beta$ , TNF- $\alpha$  and IL-6) by ELISA. In (**a**, **b**, **d** and **g**), all error bars, mean values  $\pm$  SEM, P-values were determined by unpaired two-tailed Student's t test of n=3 independent biological experiment. For (**c-f**), similar results are obtained for three independent biological experiments. Source data are provided as a Source Data file.



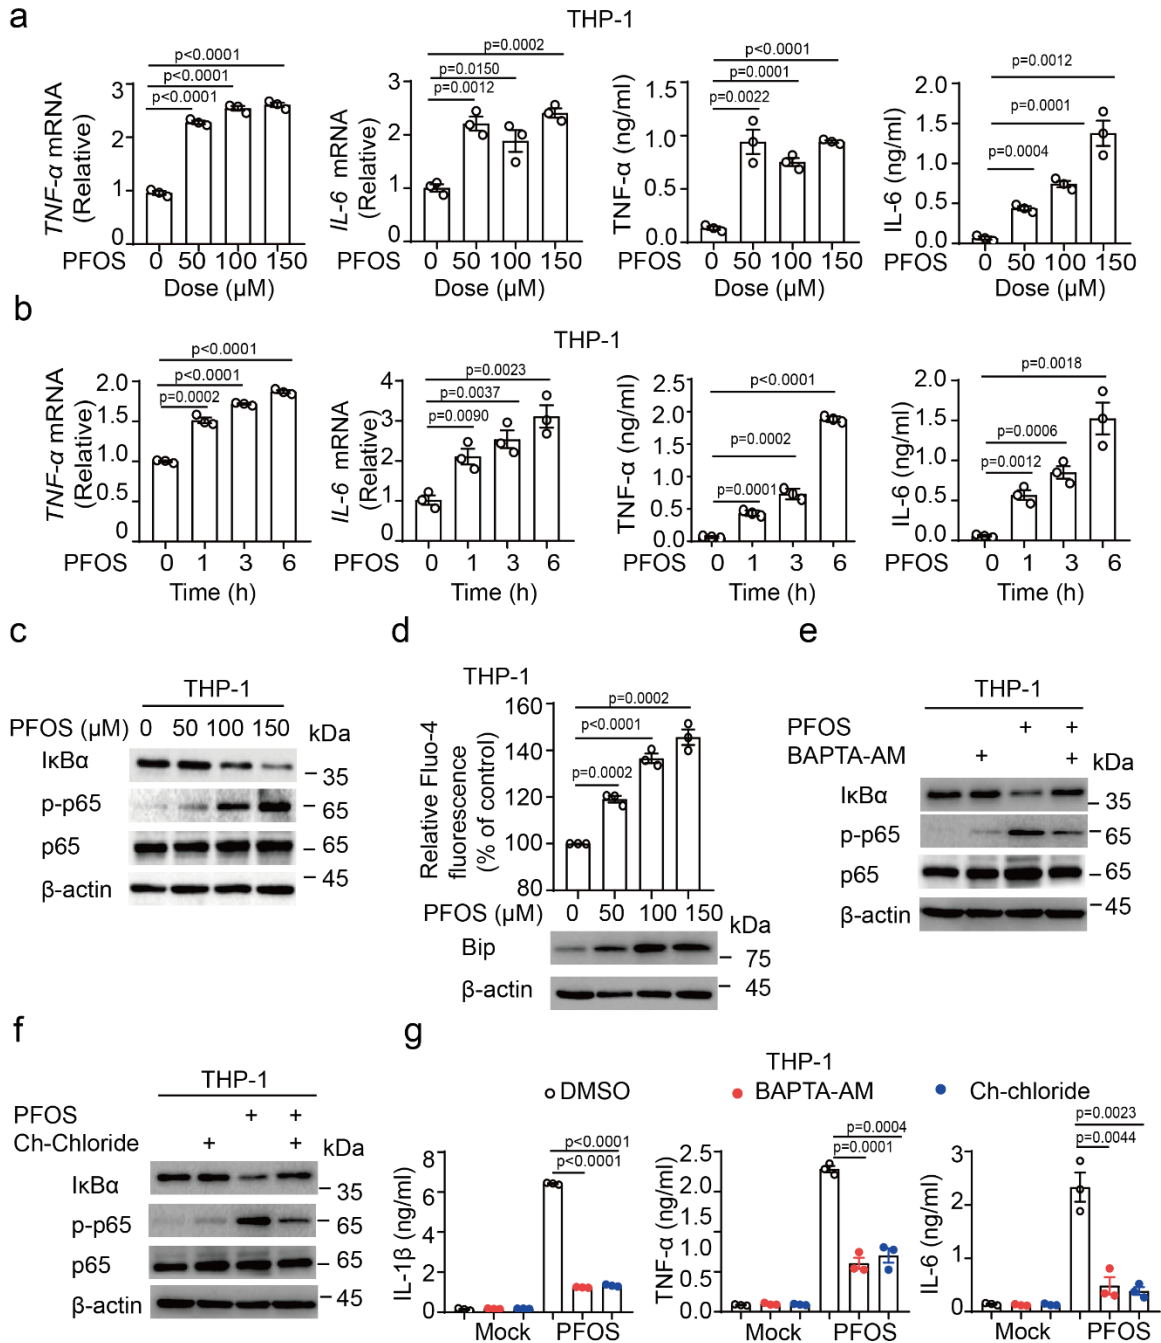

**Supplementary Fig. 5 PFOS-induced NF-κB signaling activation was mediated through Ca<sup>2+</sup>-PKC dependent pathway in THP-1-derived macrophages. a-b** THP-1-derived macrophages were stimulated with PFOS in a dose-dependent manner for 6 h (a) or in time-dependent manner with 150 μM PFOS (b). The expression level and release of TNF-α and IL-6 were determined. **c-d** THP-1-derived macrophages were treated with PFOS in a dose-dependent manner for 6 h. Immunoblot analysis of NF-κB signaling

pathway were detected with indicated antibodies (**c**). The cytosolic  $\text{Ca}^{2+}$  ( $[\text{Ca}^{2+}]_c$ ) in THP-1-derived macrophages with PFOS as indicated doses for 6 h, was performed by measuring the fluorescence of cells stained with Fluo-4 AM via using fluorescence microplate reader (excitation and emission wavelength at 488 nm and 520 nm, respectively) (**d**). **e-g** THP-1-derived macrophages were pretreated with  $\text{Ca}^{2+}$  chelator (BAPTA-AM, 50  $\mu\text{M}$  for 1 h, red plots) or PKC inhibitor chelerythrine chloride (Ch-Chloride, 10  $\mu\text{M}$  for 1 h, blue plots) and then stimulated with PFOS (150  $\mu\text{M}$ , 6 h). Cell lysates were harvested for immunoblot analysis. Cell supernatants were collected to determine the production of proinflammatory cytokines (IL-1 $\beta$ , TNF- $\alpha$  and IL-6) by ELISA. In (**a**, **b**, **d** and **g**), all error bars, mean values  $\pm$  SEM, P-values were determined by unpaired two-tailed Student's t test of n=3 independent biological experiment. For (**c-f**), similar results are obtained for three for three independent biological experiments. Source data are provided as a Source Data file.

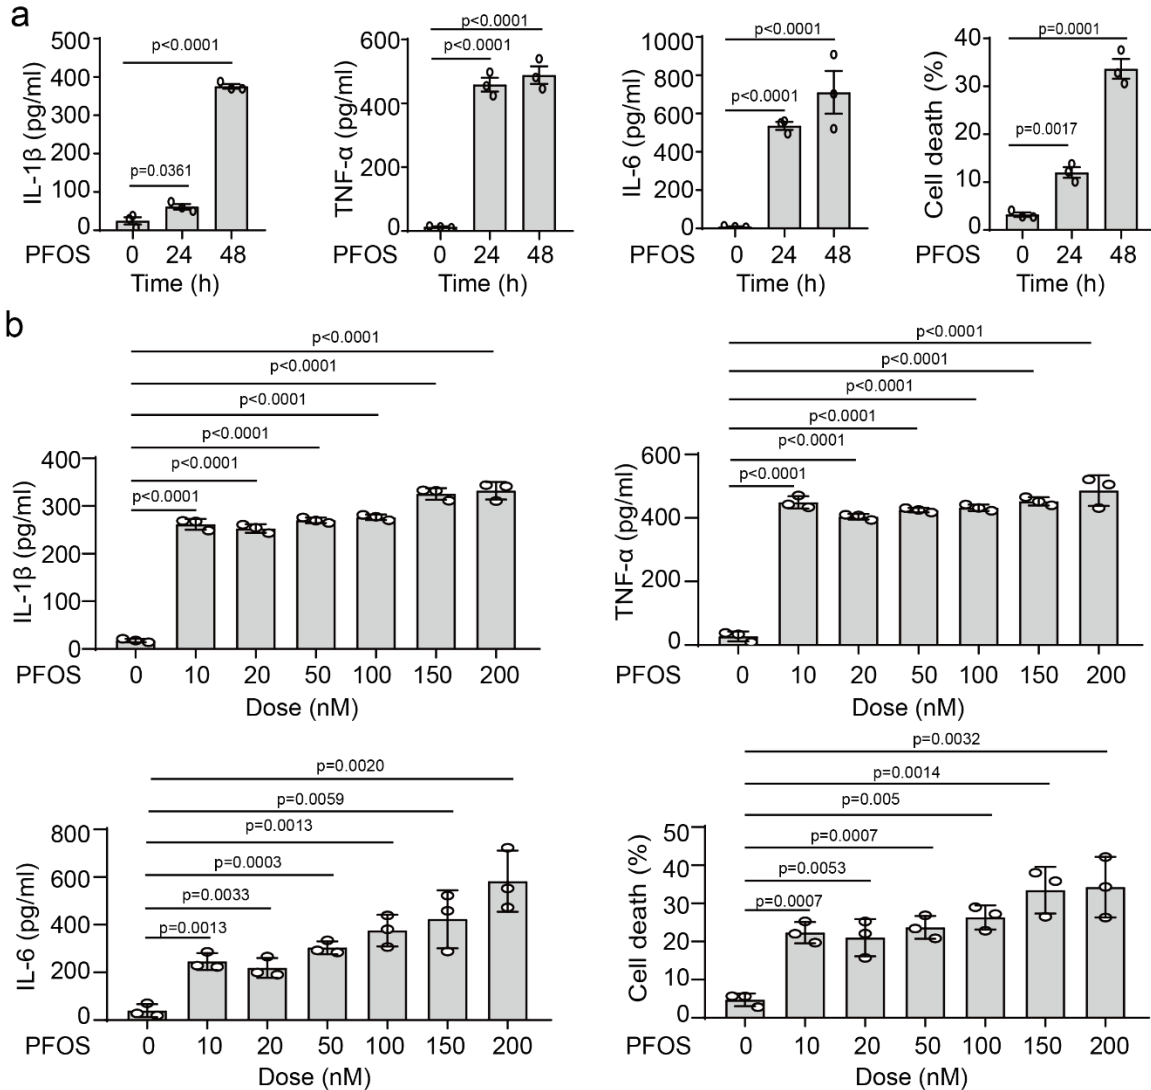

**Supplementary Fig. 6 Low concentrations of PFOS triggered proinflammatory cytokines production and cell death in THP-1-derived macrophages. a-b** THP-1-derived macrophages were treated with PFOS (200 nM) as indicated time points (**a**) or as indicated doses for 48 h (**b**). The production of IL-1 $\beta$ , TNF- $\alpha$  and IL-6 and the cell death were determined. All error bars, mean values  $\pm$  SEM, P-values were determined by unpaired two-tailed Student's t test of n=3 independent biological experiment. Source data are provided as a Source Data file.

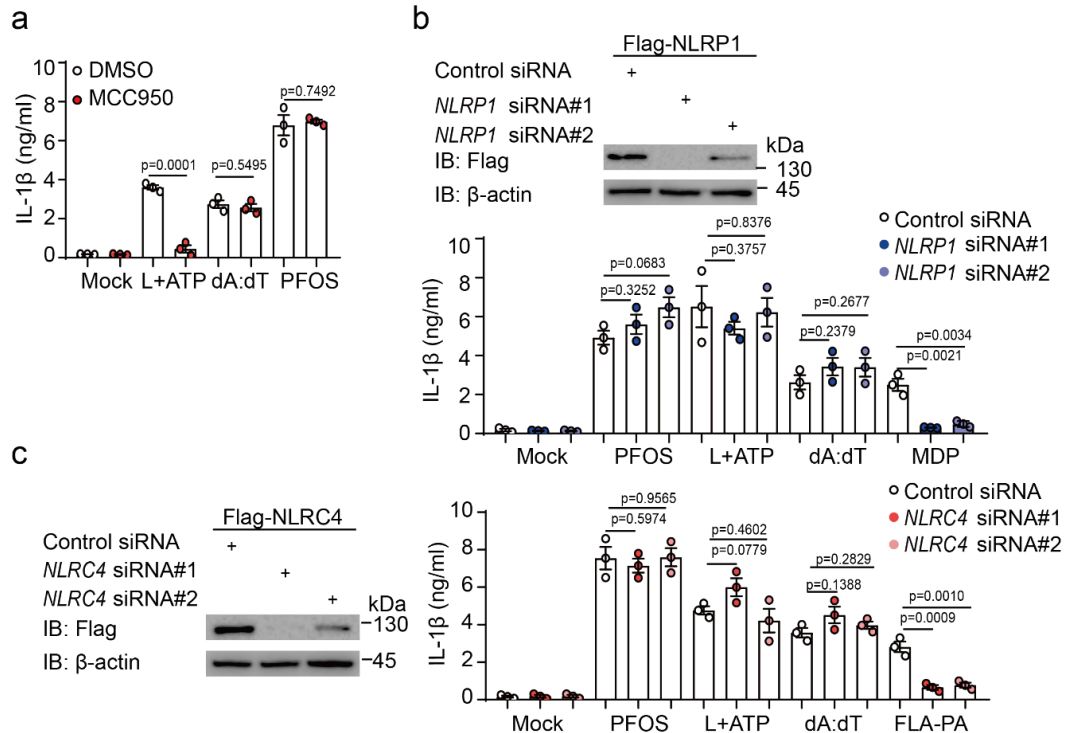

**Supplementary Fig. 7 PFOS-induced IL-1 $\beta$  production is independent on NLRP3/NLRP1/NLRC4 inflammasome.** **a** THP-1-derived macrophages were pretreated with NLRP3 specific inhibitor MCC950 (10  $\mu$ M, red plots) for 1 h and subsequently treated with PFOS (150  $\mu$ M, 6 h) or poly (da:dT) (2  $\mu$ g/ml, 6 h) or pre-treated with LPS (200 ng/ml, 3 h) followed by ATP (5 mM, 6 h). Cell supernatants were collected to measure IL-1 $\beta$  production by ELISA. **b-c** NLRP1 knockdown (KD) (*NLRP1* siRNA#1: deep blue plots; #2: light blue plots) (**b**) or NLRC4 KD (**c**) (*NLRC4* siRNA#1: deep red plots; #2: light red plots) THP-1-derived macrophages were treated with PFOS (150  $\mu$ M, 6 h), AIM2 agonist poly (da:dT) (2  $\mu$ g/ml, 6 h), NLRP1 agonist muramyl dipeptide (MDP, 500 ng/mL, 6 h), NLRC4 agonist FLA-PA (0.1  $\mu$ g/mL, 6 h), or pre-treated with LPS (200 ng/ml, 3 h) before ATP (5 mM, 6 h). IL-1 $\beta$  release was measured in the supernatants by ELISA. All error bars, mean values  $\pm$  SEM, P-values were determined by unpaired two-tailed Student's t test of n=3 independent biological experiment. Source data are provided as a Source Data file.

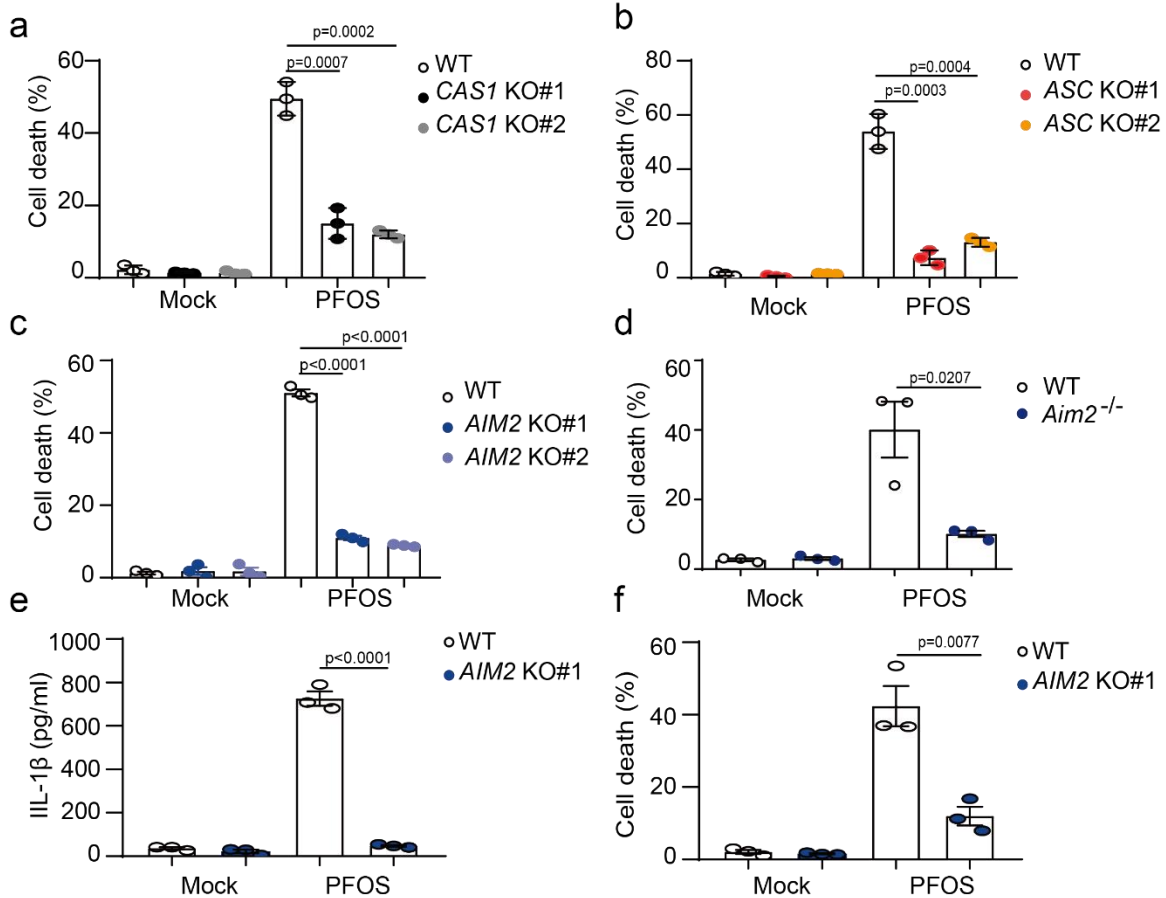

**Supplementary Fig. 8 AIM2 inflammasome is required for IL-1 $\beta$  production and cell death induced by PFOS with different doses. a-d** WT (white), *CAS1* KO (a, KO#1: black, KO#2: grey), *ASC* KO (b, KO#1: red plots; KO#2: orange plots), *AIM2* KO (c, KO#1: deep blue plots; KO#2: light blue plots) THP-1-derived macrophages or *Aim2*<sup>-/-</sup> Bone marrow-derived macrophages (BMDMs) (d, blue plots) were treated with PFOS (150  $\mu$ M, 6 h). Cell supernatants were then collected to measure cell death by LDH release. e-f *AIM2* KO#1 (blue plots) THP-1-derived macrophages were treated with PFOS (200 nM, 48 h). IL-1 $\beta$  and LDH release were measured in the supernatants. All error bars, mean values  $\pm$  SEM, P-values were determined by unpaired two-tailed Student's t test of n=3 independent biological experiment. Source data are provided as a Source Data file.

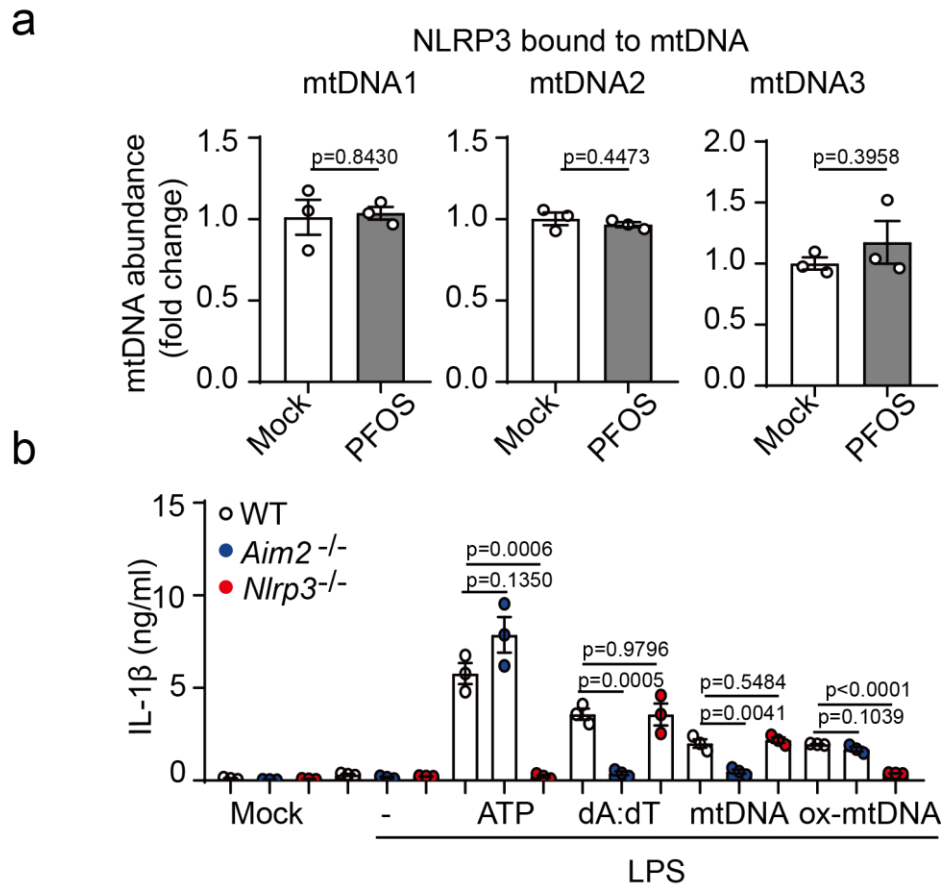

**Supplementary Fig. 9 Non-oxidized mtDNA induces AIM2 inflammasome activation and oxidized-mtDNA activates NLRP3 inflammasome.** **a** Relative enrichment of DNA in AIM2-pulldown material from Mock or PFOS (150  $\mu$ M, 6 h) condition. qPCR for three sets of primers that amplify fragments from different regions of the human mtDNA. **b** WT, *Aim2*<sup>-/-</sup> (blue plots) and *Nlrp3*<sup>-/-</sup> (red plots) Bone marrow-derived macrophages (BMDMs) primed with LPS (500 ng/ml, 3 h) were incubated with NLRP3 agonist ATP (5 mM, 6 h), AIM2 agonist poly (dA:dT) (2  $\mu$ g/ml, 6 h), synthetic mtDNA (non-oxidized mtDNA, 2  $\mu$ g/ml, 6 h), oxidized-mtDNA (2  $\mu$ g/ml, 6 h), and then the release of IL-1 $\beta$  was measured by ELISA. All error bars, mean values  $\pm$  SEM, P-values were determined by unpaired two-tailed Student's t test of n=3 independent biological experiment. Source data are provided as a Source Data file.

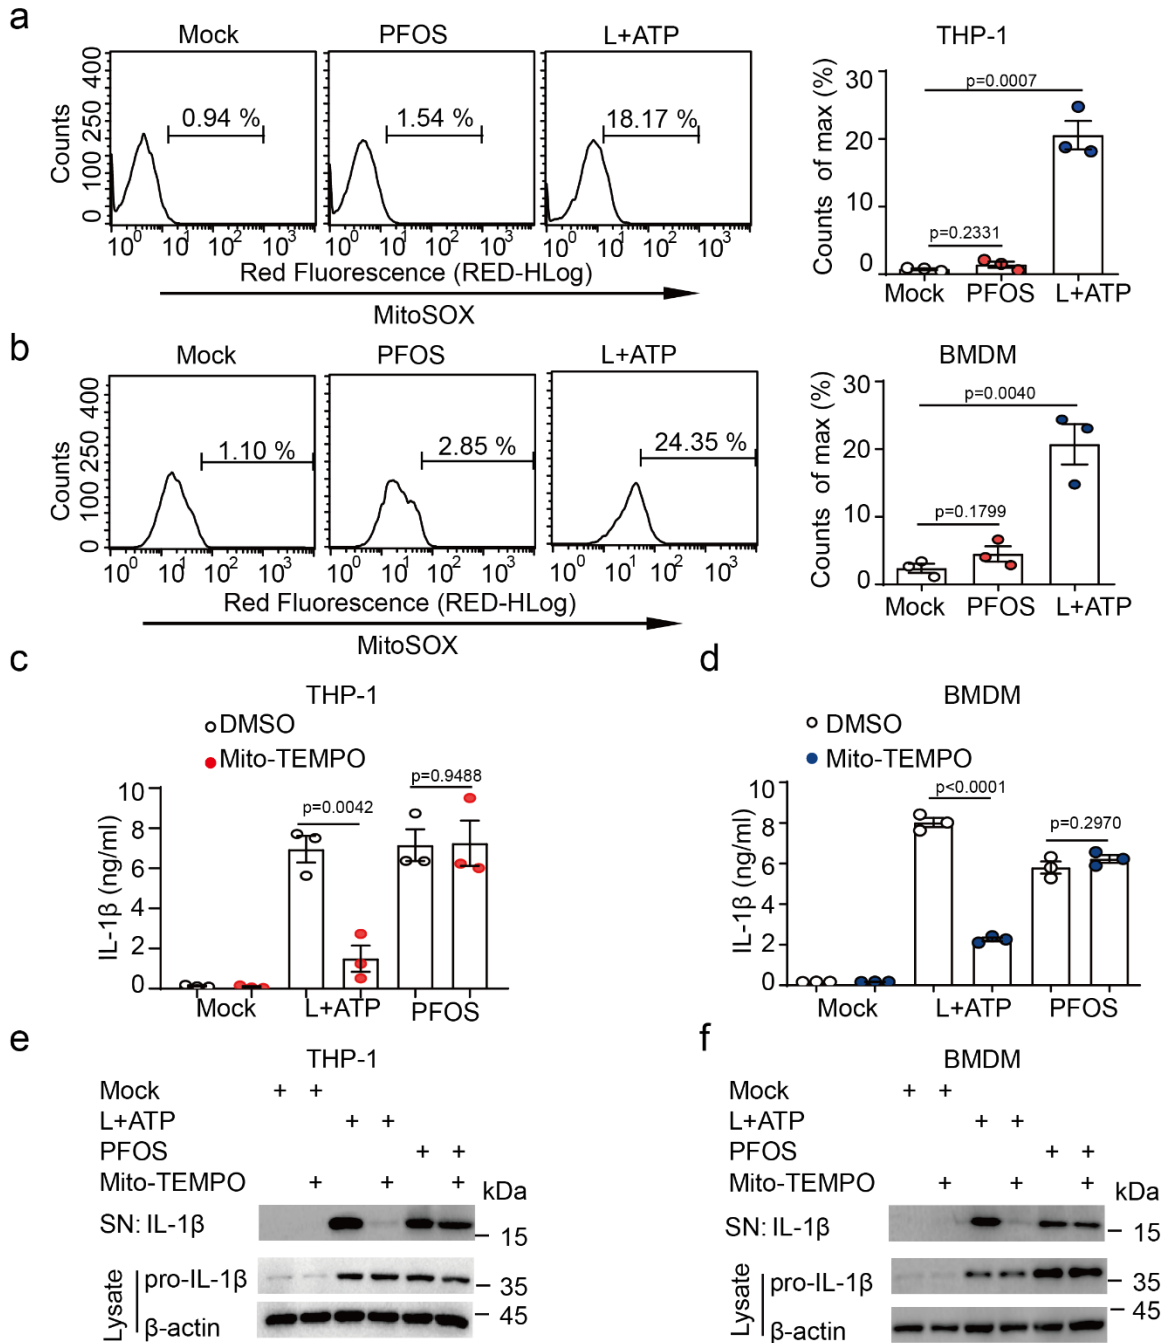

**Supplementary Fig. 10 PFOS-induced AIM2 inflammasome activation is independent of mtROS generation.** **a-f** THP-1-derived macrophages (**a**) or Bone marrow-derived macrophages (BMDMs) (**b**) were treated with PFOS (150  $\mu$ M, 6 h) or primed with LPS (200 ng/ml, 3 h) followed by ATP (5 mM, 6 h), the mitochondrial ROS generation was assessed by flow cytometry of cells stained with MitoSOX. ELISA analysis of IL-1 $\beta$  secretion from supernatants of THP-1-derived macrophages (**c**) or Bone marrow-derived

macrophages (BMDMs) (**d**) and treated with PFOS, LPS plus ATP, PFOS plus Mito-TEMPO (500  $\mu$ M/1 h; THP-1: red plots; BMDMs: blue plots ) or LPS plus ATP plus Mito-TEMPO. The maturation of IL-1 $\beta$  (p17) in the cell supernatants and pro-IL-1 $\beta$  in the cell lysates of THP-1-derived macrophages (**e**) or Bone marrow-derived macrophages (BMDMs) (**f**) as indicated were determined by immunoblot. In (**a-d**), all error bars, mean values  $\pm$  SEM, P-values were determined by unpaired two-tailed Student's t test of n=3 independent biological experiment. For (**e** and **f**), similar results are obtained for three independent biological experiments. Source data are provided as a Source Data file.



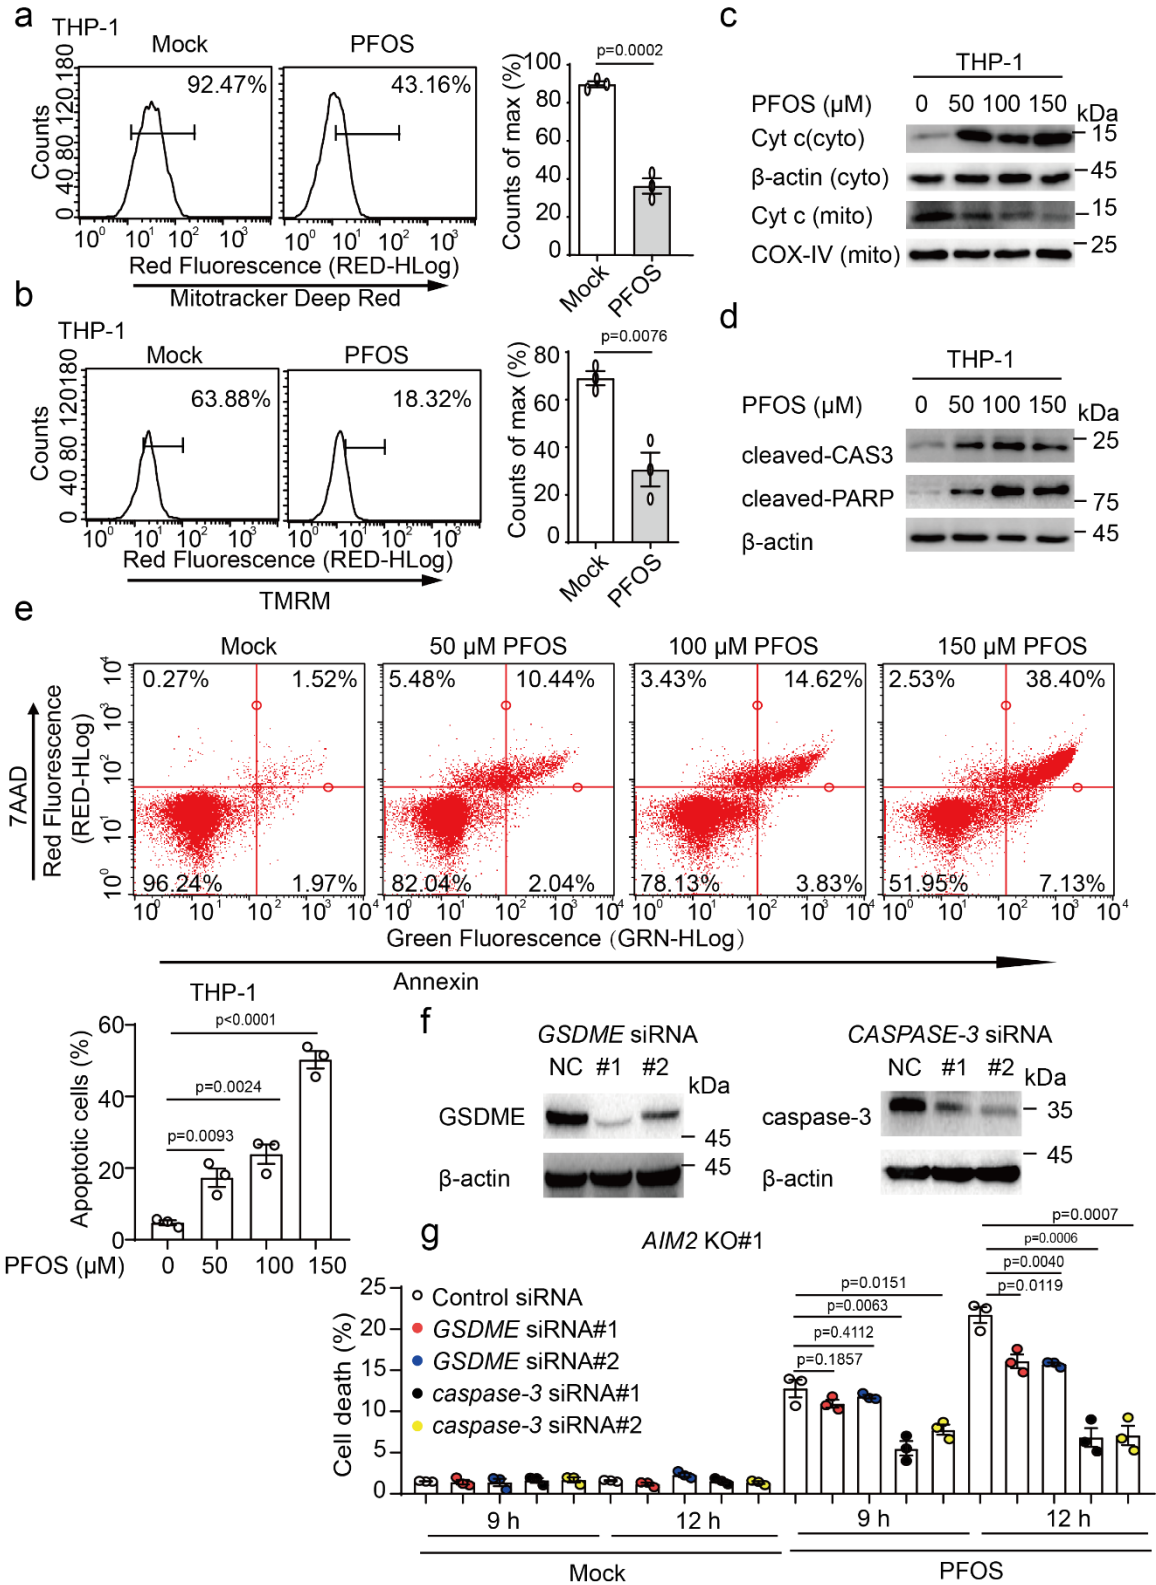

**Supplementary Fig. 11 PFOS triggers mitochondrial dysfunction and apoptosis in THP-1-derived macrophages. a-b** THP-1-derived macrophages were treated with PFOS

(150  $\mu$ M, 6 h), and the mitochondrial respiration and membrane potential were assessed by flow cytometry of cells stained with Mitotracker deep red (**a**) and tetramethylrhodamine methyl ester (TMRM) (**b**), respectively. **c-d** Immunoblot analysis of Cytochrome c (Cyt c) from cytosolic extracts and mitochondria (**c**) or cleaved-caspase-3 (cleaved-CAS3) and cleaved- PARP (**d**) derived from THP-1-derived macrophages stimulated with PFOS. **e** Apoptosis was assayed with Annexin V/7AAD staining of THP-1-derived macrophages with indicated dose of PFOS for 6 h. **f-g** *GSDME* knockdown (*GSDME* siRNA#1: red plots; #2: blue plots) or *CASPASE-3* knockdown (*CASPASE-3* siRNA#1: black plots; #2: yellow plots) in *AIM2* knockout (KO)-THP-1-derived macrophages were treated with PFOS (150  $\mu$ M, 6 h) as indicated time. Cell lysates were collected to determine the knockdown efficiency of *GSDME* or *CASPASE-3* by immunoblot (**f**). Culture supernatant was then harvested to measure cell death by LDH release (**g**). In (**a**, **b**, **e** and **g**), all error bars, mean values  $\pm$  SEM, P-values were determined by unpaired two-tailed Student's t test of n=3 independent biological experiment. For (**c-d** and **f**), similar results are obtained for three independent biological experiments. Source data are provided as a Source Data file.

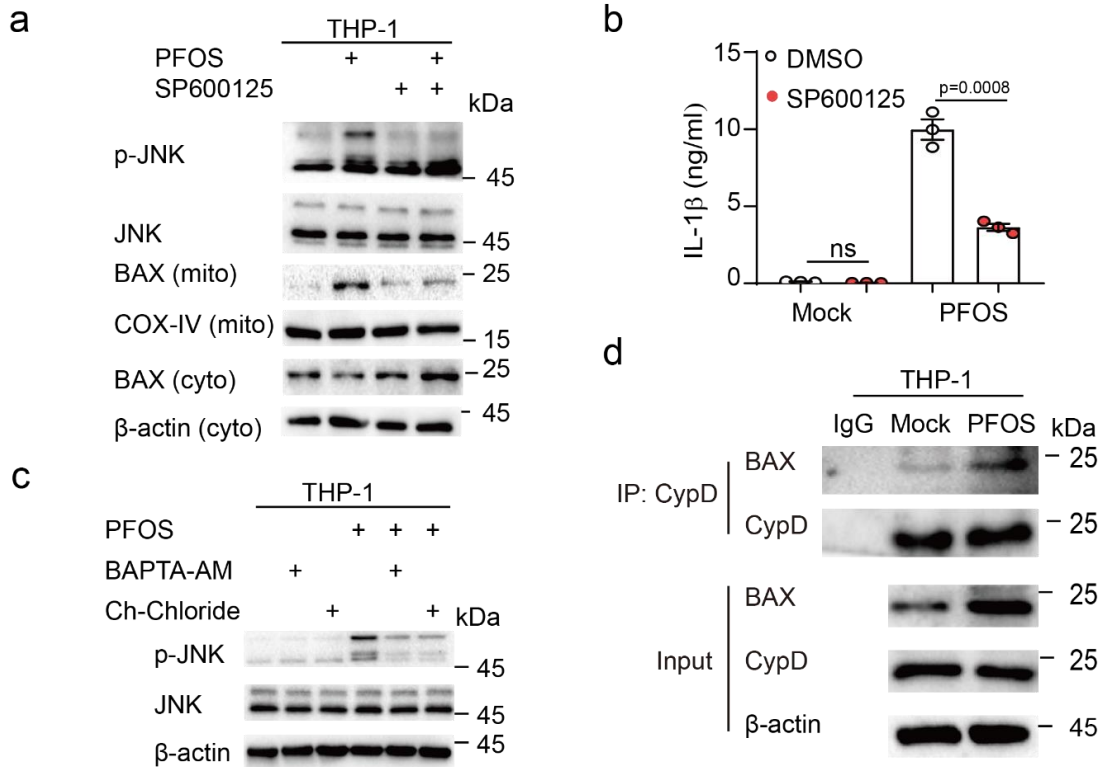

**Supplementary Fig. 12 PFOS triggers  $\text{Ca}^{2+}$ -PKC-JNK pathway-dependent BAX activation and induces the interaction between BAX-CypD.** **a-b** THP-1-derived macrophages were pretreated with JNK specific inhibitor SP600125 (40  $\mu\text{M}$  for 1 h, red plots) and subsequently treated with PFOS (150  $\mu\text{M}$ , 6 h). Cell lysates were collected to detect the phosphorylation of JNK and BAX translocation (**a**). Cell supernatants were collected to measure IL-1 $\beta$  production by ELISA (**b**). **c** THP-1-derived macrophages were pretreated with  $\text{Ca}^{2+}$  chelator BAPTA-AM (50  $\mu\text{M}$ , 1 h) or PKC inhibitor chelerythrine chloride (Ch-Chloride, 10  $\mu\text{M}$ , 1 h) and subsequently treated with PFOS (150  $\mu\text{M}$ , 6 h). Cell lysates were collected for immunoblot analysis. **d** THP-1-derived macrophages were treated with PFOS (150  $\mu\text{M}$ , 6 h) and then cell lysates were subjected to immunoprecipitation with anti-CypD and immunoblot with anti-BAX. For (**a** and **c-d**), similar results are obtained for three independent biological experiments. In **b**, error bars, mean values  $\pm$  SEM, P-values were determined by unpaired two-tailed Student's t test of  $n=3$  independent biological experiment. Source data are provided as a Source Data file.

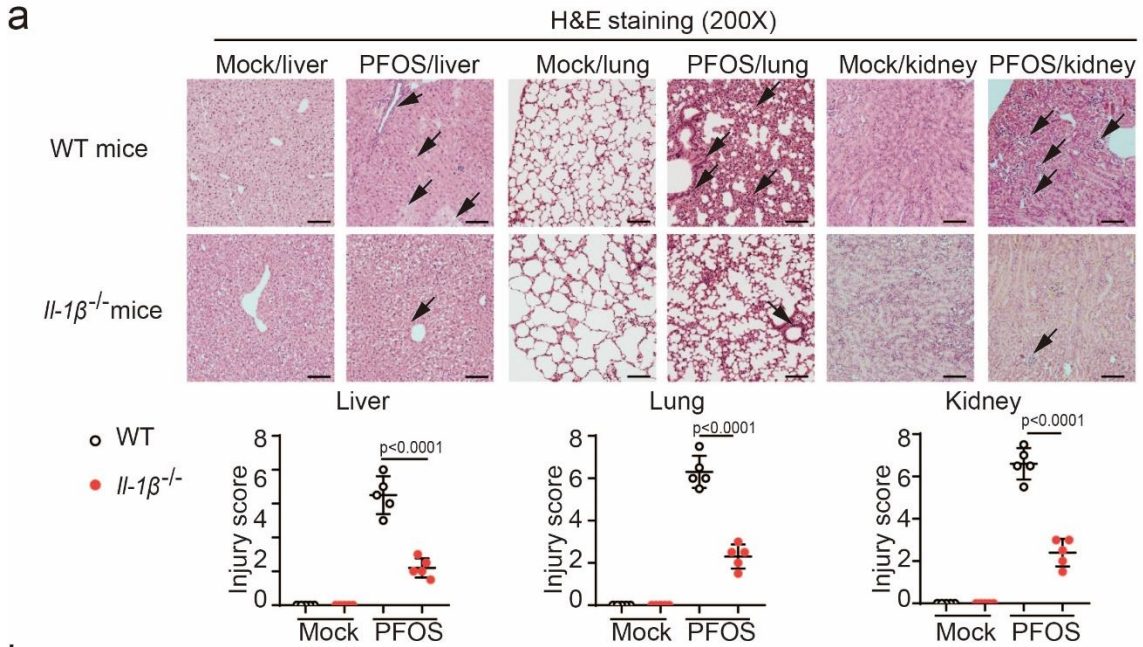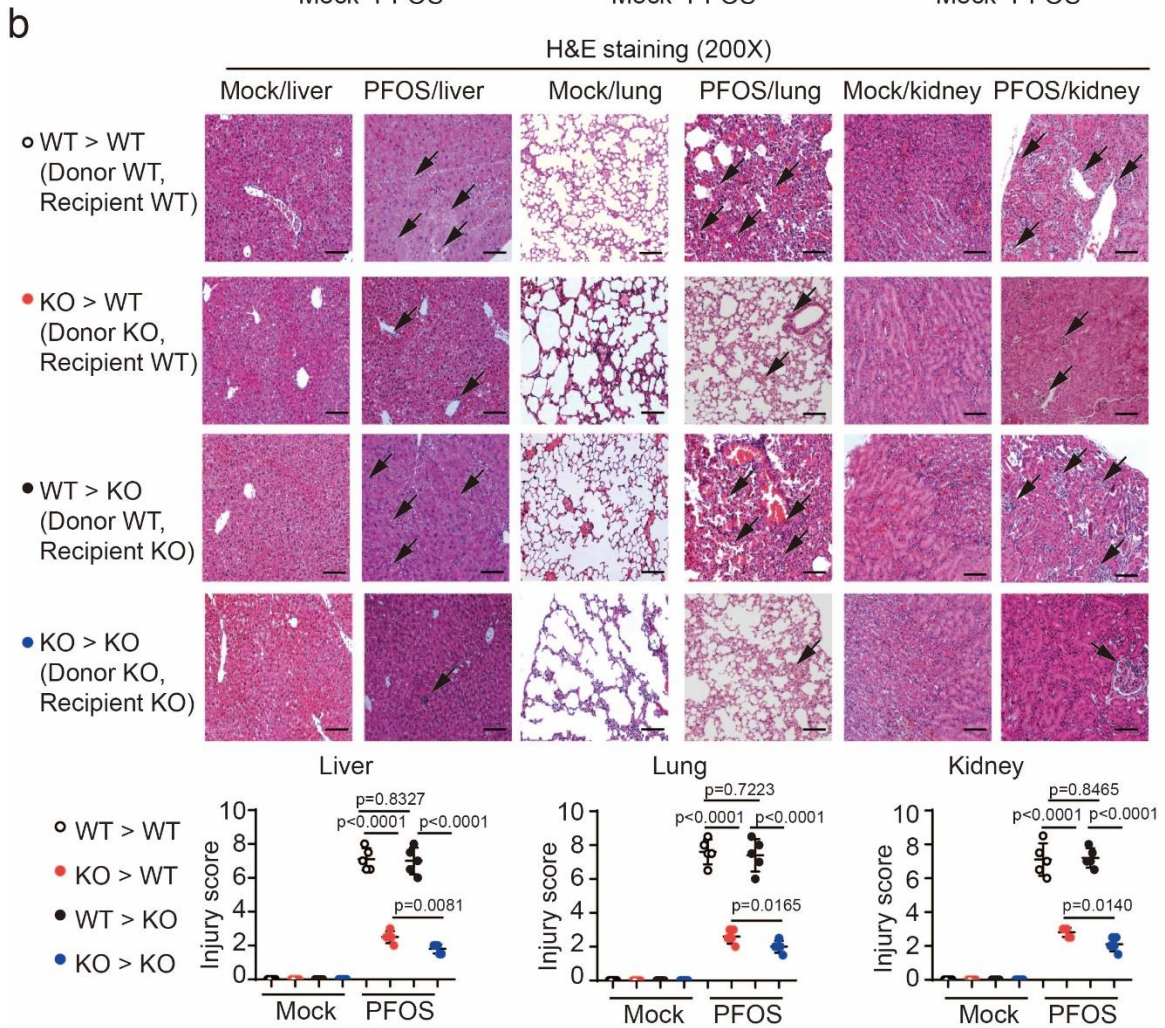

**Supplementary Fig. 13 The effects of IL-1 $\beta$ -dependent tissue injury by PFOS exposure and the role of AIM2 in myeloid-derived cells on PFOS-induced inflammatory responses *in vivo*.** **a-b** Wild type (WT) and *IL-1 $\beta$ <sup>-/-</sup>* (red plots) mice (female, 6 weeks old, n=5) (**a**) or the indicated bone marrow chimera mice (**b**, female, 6 weeks old, n=5) (KO > WT: red plots; WT > KO: black plots; KO > KO: blue plots) were i.p. with PBS containing 2 % Tween-80 (Mock) or PFOS (25 mg/kg body weight per day). At 5 days post-treatment, liver tissue, lung tissue and kidney tissue of these mice were stained with hematoxylin-eosin (H&E) and assayed using a light microscope with  $\times 200$  magnification. Scale bar, 100  $\mu$ m. The tissue (liver, lung, and kidney) injury score was determined and averaged in 5 randomly selected nonoverlapping fields from respective individual mouse tissue sections. All histology analyses were conducted in a blinded manner. All error bars, mean values  $\pm$  SD, P-values were determined by unpaired two-tailed Student's t test of n=5 independent biological mice per group. Source data are provided as a Source Data file.

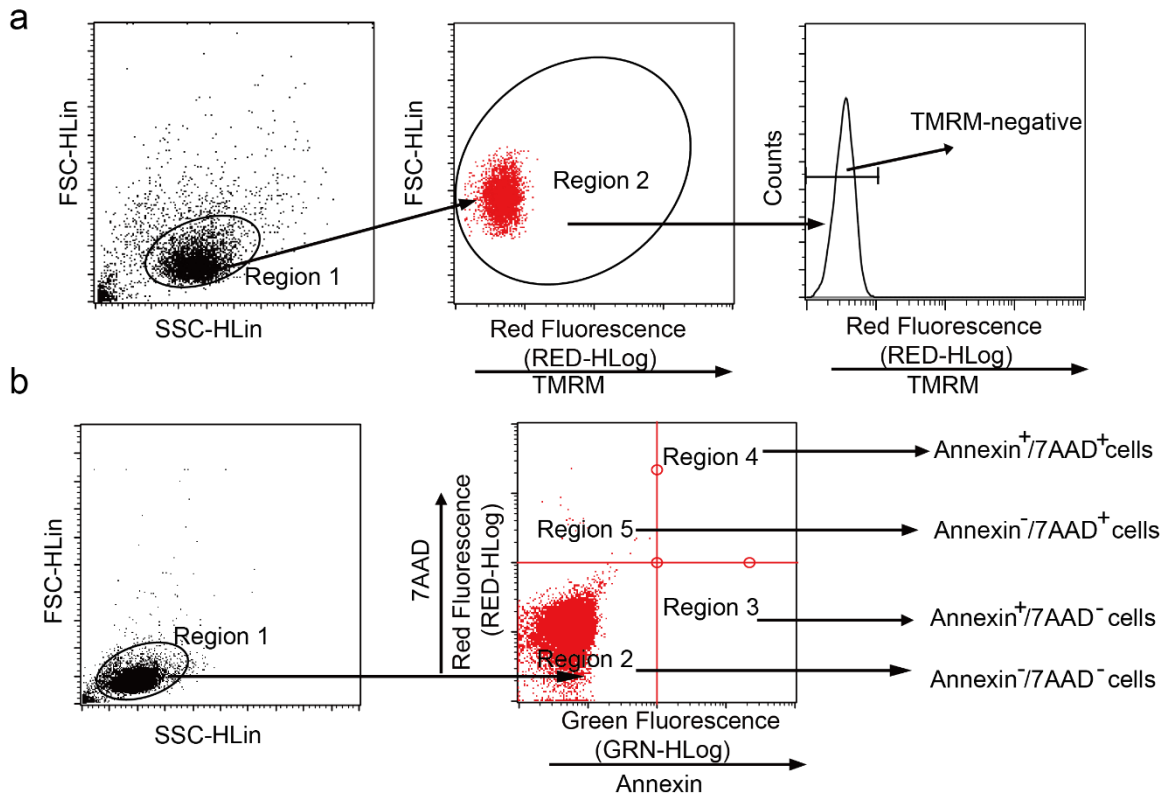

**Supplementary Fig. 14 Gating strategies used for apoptotic cells and TMRM-negative/positive cells detection.** (a) Gating strategy to assay TMRM-positive cells of Fig.4b and Supplementary Fig.11b: left, Region 1 indicating starting cells of non-staining sample were gated by FSC-HLin/SSC-HLin; middle: Region 2 indicating all cells from Region 1 were gated by FSC-HLin/ Red Fluorescence (RED-HLog); right: TMRM-negative cells. The same strategy was used to detect the Mitotracker Deep Red- positive cells presented in Fig.4a and Supplementary Fig.11a and MitoSox-positive cells presented in Supplementary Fig.10a and b. (b) Gating strategy to assay apoptotic cells: left, starting cells of non-staining samples were gated by FSC-HLin/SSC-HLin; right, all cells from Region 1 were gated by Red Fluorescence (RED-HLog)/ Green Fluorescence (GRN-HLog). The cells in the Region 2 are indicated as living cells and the living cells of the non-staining sample is > 98%. The cells in the Region 3, 4 and 5 are indicated as early apoptotic cells, intermediate/late apoptotic cells and necrotic cells, respectively. The total of apoptotic cells of sample (%) = cells (%) in the Region 3 + cells (%) in the Region 4.

**Supplementary Table 1. Dilution of antibodies used in this study**

| Antibodies                           | Source                    | Identifier     | Dilution                      |
|--------------------------------------|---------------------------|----------------|-------------------------------|
| Anti-Flag (M2)                       | Sigma-Aldrich             | Cat# F1804     | 1:3000 for WB                 |
| Anti- $\beta$ -actin                 | Sigma-Aldrich             | Cat# A1978     | 1:4000 for WB                 |
| Anti-Bip                             | Beyotime Technology       | Cat# AB310     | 1:1000 for WB                 |
| Anti-AIM2                            | Abcam                     | Cat# ab93105   | 1:1000 for WB<br>1:400 for IP |
| Anti-COX-IV                          | Abcam                     | Cat# ab16056   | 1:1000 for WB                 |
| Anti-ASC                             | Santa Cruz Biotechnology  | Cat# sc-271054 | 1:1000 for WB                 |
| Anti-caspase-1                       | Santa Cruz Biotechnology  | Cat# sc-515    | 1:1000 for WB                 |
| Anti-Bcl-2                           | Santa Cruz Biotechnology  | Cat# sc-7382   | 1:1000 for WB                 |
| Anti-GSDMD                           | Santa Cruz Biotechnology  | Cat# sc-81868  | 1:1000 for WB                 |
| Anti-GSDME                           | Santa Cruz Biotechnology  | Cat# sc-393162 | 1:1000 for WB                 |
| Anti-Cyclophilin D/<br>Cyclophilin F | Santa Cruz Biotechnology  | Cat# sc-376061 | 1:1000 for WB<br>1:400 for IP |
| Goat anti-mouse                      | Santa Cruz Biotechnology  | Cat# sc-2005   | 1:4000 for WB                 |
| Goat anti-rabbit                     | Santa Cruz Biotechnology  | Cat# sc-2004   | 1:4000 for WB                 |
| Anti-JNK                             | Cell Signaling Technology | Cat# 9252      | 1:1000 for WB                 |
| Anti-phospho-<br>SAPK/JNK            | Cell Signaling Technology | Cat# 9255      | 1:1000 for WB                 |
| Anti-BAX                             | Cell Signaling Technology | Cat# 5023      | 1:1000 for WB<br>1:400 for IP |

|                            |                           |                |                               |
|----------------------------|---------------------------|----------------|-------------------------------|
| Anti-BAK                   | Cell Signaling Technology | Cat# 12105     | 1:1000 for WB                 |
| Anti-Cytochrome c          | Cell Signaling Technology | Cat# 4272      | 1:1000 for WB                 |
| Anti-cleaved caspase-3     | Cell Signaling Technology | Cat# 9664      | 1:1000 for WB                 |
| Anti-cleaved PARP          | Cell Signaling Technology | Cat# 5625      | 1:1000 for WB                 |
| Anti-IL-1 $\beta$          | Cell Signaling Technology | Cat# 12242     | 1:1000 for WB                 |
| Anti-caspase-1             | Cell Signaling Technology | Cat# 2225      | 1:1000 for WB                 |
| Anti-I $\kappa$ B $\alpha$ | Cell Signaling Technology | Cat# 4814      | 1:1000 for WB                 |
| Anti-p65                   | Cell Signaling Technology | Cat# 6956      | 1:1000 for WB                 |
| Anti-p-p65                 | Cell Signaling Technology | Cat# 3033      | 1:1000 for WB                 |
| Anti-NLRP3                 | AdipoGen                  | Cat# A27391510 | 1:3000 for WB<br>1:400 for IP |



**Supplementary Table 2. Sequences of PCR primers used in this study**

| Gene Name                            | Primer  | Sequence                         |
|--------------------------------------|---------|----------------------------------|
| Human <i>IL-1<math>\beta</math></i>  | Forward | 5'-AGCTACGAATCTCCGACCAC-3'       |
|                                      | Reverse | 5'-CGTTATCCCATGTGTCTGAAGAA-3'    |
| Human <i>TNF-<math>\alpha</math></i> | Forward | 5'-GAGGCCAAGCCCTGGTATG-3'        |
|                                      | Reverse | 5'-CGGGCCGATTGATCTCAGC-3'        |
| Human <i>IL-6</i>                    | Forward | 5'-ACTCACCTCTTCAGAACGAATTG-3'    |
|                                      | Reverse | 5'-CCATCTTTGGAAGGTTTCAGGTTG-3'   |
| Human <i>BCL-2</i>                   | Forward | 5'-GGTGGGGTCATGTGTGTGG-3'        |
|                                      | Reverse | 5'-CGGTTTCAGGTAAGTCTCAGTCATCC-3' |
| Human <i>BAX</i>                     | Forward | 5'-CCCGAGAGGTCTTTTTCCGAG-3'      |
|                                      | Reverse | 5'-CCAGCCCATGATGGTTCTGAT-3'      |
| Human <i>BAK</i>                     | Forward | 5'-GTTTTCCGCAGCTACGTTTTT-3'      |
|                                      | Reverse | 5'-GCAGAGGTAAGGTGACCATCTC-3'     |
| Human <i>GAPDH</i>                   | Forward | 5'-GGAGCGAGATCCCTCCAAAAT-3'      |
|                                      | Reverse | 5'-GGCTGTTGTCATACTTCTCATGG-3'    |
| Mouse <i>Il-1<math>\beta</math></i>  | Forward | 5'-GCAACTGTTCCCTGAACTCAACT-3'    |
|                                      | Reverse | 5'-ATCTTTTGGGGTCCGTCAACT-3'      |
| Mouse <i>Tnf-<math>\alpha</math></i> | Forward | 5'-GACGTGGAAGTGGCAGAAGAG-3'      |
|                                      | Reverse | 5'-TTGGTGGTTTGTGAGTGTGAG-3'      |
| Mouse <i>Il-6</i>                    | Forward | 5'-TAGTCCTTCCCTACCCCAATTTCC-3'   |
|                                      | Reverse | 5'-TTGGTCCTTAGCCACTCCTTC-3'      |
| Mouse <i>Gapdh</i>                   | Forward | 5'-AGGTCGGTGTGAACGGATTTG-3'      |
|                                      | Reverse | 5'-TGTAGACCATGTAGTTGAGGTCA-3'    |
| Human <i>D-loop</i>                  | Forward | 5'-GTTTATGTAGCTTACCTCCTC-3'      |
|                                      | Reverse | 5'-TTGTTTATGGGGTGATGTGAG-3'      |
| Human <i>Tert</i>                    | Forward | 5'-TCACGGAGACCACGTTTCAA-3'       |
|                                      | Reverse | 5'-TTCAAGTGCTGTCTGATTCCAAT-3'    |
| Mouse <i>D-loop</i>                  | Forward | 5'-AATCTACCATCCTCCGTGAAACC-3'    |
|                                      | Reverse | 5'-TCAGTTTAGCTACCCCAAGTTTAA-3'   |

|                     |         |                                  |
|---------------------|---------|----------------------------------|
| Mouse <i>Tert</i>   | Forward | 5'- CTAGCTCATGTGTCAAGACCCTCTT-3' |
|                     | Reverse | 5'- GCCAGCACGTTTCTCTCGTT-3'      |
| <i>EGFP</i>         | Forward | 5'-ACGGCGACGTAAACGGCCAC-3'       |
|                     | Reverse | 5'-GCACGCCGTAGGCTAGGGTG-3'       |
| Human <i>mtDNA1</i> | Forward | 5'-CACCCAAGAACAGGGTTTGT-3'       |
|                     | Reverse | 5'-TGGCCATGGGTATGTTGTTAA-3'      |
| Human <i>mtDNA2</i> | Forward | 5'-CTATCACCTATTAACCACTCA-3'      |
|                     | Reverse | 5'-TTCGCCTGTAATATTGAACGTA-3'     |
| Human <i>mtDNA3</i> | Forward | 5'-AATCGAGTAGTACTCCCGATTG-3'     |
|                     | Reverse | 5'-TTCTAGGACGATGGGCATGAAA-3'     |
| Human <i>Myc</i>    | Forward | 5'-AAGGACTATCCTGCTGCCAA-3        |
|                     | Reverse | 5'-CCTCTTGACATTCTCCTCGG-3'       |
| Human <i>Sox2</i>   | Forward | 5'-TTTTGTTCGGAGACGGAGAAG-3'      |
|                     | Reverse | 5'-CATGAGCGTCTTGGTTTTCC-3'       |
| Human <i>18S</i>    | Forward | 5'- TAGAGGGACAAGTGGCGTTC-3'      |
|                     | Reverse | 5'- CGCTGAGCCAGTCAGTGT -3'       |
